# Supplementary material
Source: publisher figshare collection journal article supplement (https://gsajournals.figshare.com/ndownloader/files/24459335)
Supplement: Supplementary file 1 [file 24459335]

**Supplementary Table 1: Potato germplasm used in this study**

| Genotype abbreviation | Description | Ploidy | Flower color | Reference |
| --- | --- | --- | --- | --- |
| **DM** | Doubled monoploid DM 1-3 516 R44 | diploid | white | (Potato Genome Sequencing Consortium 2011) |
|  |  |  |  |  |
| **RH** | RH89-039-16 | diploid | purple | (Potato Genome Sequencing Consortium 2011) |
|  |  |  |  |  |
| **DRH** | F1 hybrid population between DM and RH |  |  | (Felcher *et al.* 2012) |
|  |  |  |  |  |
| **DRH F1 171** | Specific F1 hybrid between DM and RH used for transformation | diploid | white | (Peterson *et al.* 2016) |
|  |  |  |  |  |
| **DRHp 28-5 (DRHp)** | Advanced inbred line of DRH F1 28 after self-pollination for 5 generations | diploid | purple | (Nadakuduti *et al.* 2019) |
|  |  |  |  |  |
| **F1 monoploids (DRHw)** | Monoploids derived by anther culture of randomly selected DRH F1 plants; only one monoploid was selected from any given F1 | monoploid | whitea | First described in this paper |
|  |  |  |  |  |
| **M1, M8, M9, M10, M11b** | Monoploids derived by anther culture of Adapted Phureja PIs 225669, 243461 and 225709 | monoploid | purple | (Hardigan *et al.* 2016) |
|  |  |  |  |  |
| **M2, M3, M5, M7b** | Monoploids derived by anther culture of Adapted Phureja PIs 225669 and 225709 | monoploid | white | (Hardigan *et al.* 2016) |

aWe would have expected both white and purple flowered monoploids as the F1 plants segregated for flower color; however, only white-flowered monoploids were recovered among 13 regenerated plants; bFor full description of the pedigree of these monoploids, see Supplementary Figure 1 in Hardigan et al. (2016)

Supplementary Table 2: Differentially expressed genes identified in the bulked segregant analysis. The gene annotation, location, and PGSC_ID are listed; as are each FDR corrected p-value and fold change, where a positive fold change indicated upregulation in the purple bulks. Genes relevant to the flavonoid biosynthetic pathway are shaded.

| **Annotation** | **Fold Change** | **FDR p-value** | **Chr** | **Chr region start** | **Chr region end** | **RPKM white 1** | **RPKM white 2** | **RPKM purple 1** | **RPKM purple 2** |
| --- | --- | --- | --- | --- | --- | --- | --- | --- | --- |
| AN2 | 532.18 | 7.34E-41 | chr10 | 51469784 | 51470105 | 0.19 | 0.18 | 121.62 | 79.31 |
| Major latex_1 | 115.58 | 3.62E-09 | chr01 | 67618877 | 67620455 | 1.49 | 0.4 | 1.15 | 217.51 |
| Glutathione S-transferase_3 | 68.02 | 6.42E-69 | chr02 | 36961220 | 36962529 | 3.39 | 2.14 | 213.54 | 162.78 |
| Caffeoyl-CoA O-methyltransferase | 37.08 | 1.64E-37 | chr09 | 54418734 | 54424093 | 6.6 | 7.42 | 348.85 | 170.9 |
| Anthocyanin 5-O-glucosyltransferase | 36.62 | 1.14E-53 | chr12 | 59388654 | 59391021 | 3.1 | 3.3 | 126.73 | 107.61 |
| Anthocyanin synthase | 28.36 | 1.39E-12 | chr08 | 53728301 | 53732590 | 1.12 | 1.03 | 29.11 | 31.83 |
| Anthocyanin permease_2 | 27.79 | 2.49E-48 | chr03 | 43777495 | 43780468 | 4.55 | 4.83 | 150.37 | 110.24 |
| Anthocyanin acyltransferase_26 | 18.19 | 1.10E-28 | chr12 | 56016125 | 56018266 | 4.47 | 4.99 | 106.3 | 65.85 |
| Flavonoid 3',5'-hydroxylase | 17.19 | 8.71E-09 | chr11 | 39417578 | 39420629 | 1.24 | 1.67 | 29.85 | 20.23 |
| Acyl:coa ligase acetate-coa synthetase_1 | 13.81 | 7.28E-06 | chr02 | 36961117 | 36964883 | 1.06 | 1.44 | 21.08 | 13.38 |
| Anthocyanin 1 | 10.29 | 0.03 | chr09 | 47422300 | 47429221 | 1.12 | 0.84 | 12 | 8.11 |
| Homeobox protein_8 | 5.31 | 1.16E-03 | chr03 | 60116827 | 60123799 | 3.34 | 3.79 | 21.33 | 16.58 |
| D-alanine-D-alanine ligase | 4.24 | 7.15E-03 | chr10 | 53674619 | 53681752 | 3.8 | 4.76 | 19.33 | 16.97 |
| Conserved gene of unknown function_3010 | 3.95 | 8.65E-10 | chr06 | 43585357 | 43588353 | 13.94 | 16.86 | 66.67 | 54.86 |
| Phenylalanine ammonia-lyase_3 | 3.91 | 6.66E-05 | chr05 | 51694755 | 51698709 | 7.99 | 8.37 | 36.26 | 27.68 |
| Aminotransferase family protein_4 | 3.22 | 2.10E-03 | chr10 | 2074803 | 2078104 | 19.8 | 16.77 | 33.32 | 84.52 |
| ASR4 | 2.66 | 7.10E-29 | chr04 | 60205626 | 60207072 | 306.51 | 310.8 | 753.53 | 885.52 |
| Proton P-ATPase | 2.55 | 6.97E-04 | chr07 | 270950 | 275949 | 20.22 | 15.16 | 40.55 | 49.7 |
| Cytochrome P450 hydroxylase_15 | 2.44 | 2.52E-12 | chr10 | 54538508 | 54540606 | 59.17 | 68.11 | 159.2 | 151.14 |
| GPI-anchored protein_2 | 2.44 | 1.52E-03 | chr03 | 4985642 | 4986819 | 18.86 | 18.09 | 45.01 | 45.04 |
| Pectate lyase P59_3 | 2.41 | 0.03 | chr03 | 31505868 | 31507745 | 14.98 | 11.85 | 29.4 | 35.33 |
| SAUR family protein_35 | 2.41 | 4.95E-03 | chr10 | 55103086 | 55103856 | 18 | 17.49 | 52.97 | 32.59 |
| Pectate lyase P59_1 | 2.36 | 0.03 | chr02 | 26017219 | 26019334 | 17.39 | 11.43 | 30 | 38.08 |
| P-coumaroyl quinate/shikimate 3'-hydroxylase_3 | 2.35 | 1.03E-03 | chr10 | 59468653 | 59471590 | 20.79 | 24.2 | 59.02 | 46.66 |
| Pectate lyase_7 | 2.34 | 9.51E-03 | chr05 | 5914722 | 5917535 | 19.18 | 13.55 | 34.24 | 42.25 |
| L-ascorbate oxidase homolog | 2.33 | 6.66E-05 | chr01 | 28857039 | 28858942 | 36.02 | 24.13 | 63.52 | 76.64 |
| Ntp201 | 2.31 | 3.63E-04 | chr01 | 1062928 | 1065071 | 30.05 | 20.6 | 52.96 | 64.01 |
| Chalcone synthase 2 | 2.31 | 1.19E-07 | chr05 | 48886959 | 48888729 | 703.22 | 1,042.37 | 1,918.86 | 2,105.95 |
| Pectinesterase_5 | 2.3 | 6.79E-05 | chr01 | 57206298 | 57208265 | 40.76 | 25.46 | 67.52 | 84.54 |
| Monosaccharide transporter 1 | 2.29 | 4.67E-03 | chr01 | 3931847 | 3936000 | 23.83 | 16.23 | 44.2 | 47.7 |
| Cullin 1A | 2.27 | 1.37E-03 | chr06 | 1962708 | 1966421 | 28.67 | 17.78 | 53.34 | 52.12 |
| PGPS/D3_2 | 2.22 | 4.66E-03 | chr03 | 46614170 | 46615243 | 26.63 | 17.48 | 42.76 | 55.35 |
| Gene of unknown function_6940 | 2.22 | 0.02 | chr11 | 38321397 | 38324170 | 17.71 | 19.15 | 42.3 | 39.62 |
| Pectinesterase_37 | 2.22 | 0.01 | chr06 | 59454833 | 59456909 | 23.09 | 15.18 | 38.77 | 46.21 |
| Conserved gene of unknown function_2983 | 2.17 | 2.92E-05 | chr06 | 40610372 | 40612477 | 52.84 | 34.67 | 86.12 | 103.57 |
| Phenylalanine ammonia-lyase_9 | 2.16 | 1.82E-06 | chr10 | 51926200 | 51930606 | 45.72 | 48.49 | 103.76 | 99.27 |
| Anthocyanidin 3-O-glucosyltransferase | 2.15 | 1.96E-08 | chr09 | 31520019 | 31521721 | 93.09 | 134 | 237.92 | 250.31 |
| KUP1_2 | 2.12 | 0.02 | chr09 | 52350668 | 52354458 | 24.27 | 17.76 | 39.17 | 50.14 |
| Gene of unknown function_2168 | 2.11 | 8.16E-07 | chr04 | 11393644 | 11394425 | 79.45 | 74.07 | 184.4 | 140.09 |
| Pectinesterase_7 | 2.1 | 1.10E-03 | chr01 | 63309078 | 63311172 | 40.51 | 27.63 | 62.02 | 81.23 |
| Pectate lyase P56 | 2.01 | 9.27E-03 | chr03 | 31546129 | 31547779 | 32.03 | 22.6 | 48.71 | 61.16 |
| Fasciclin-like arabinogalactan protein 3 | 2 | 1.24E-03 | chr08 | 2394607 | 2395637 | 43.67 | 29.55 | 69.64 | 77.14 |
| RUBP carboxylase/oxygenase activase, chloroplastic | -2.01 | 2.58E-09 | chr10 | 50945735 | 50948506 | 400.12 | 476.9 | 203.43 | 232.82 |
| Photosystem I reaction center subunit X psaK | -2.02 | 5.50E-03 | chr08 | 1301974 | 1310102 | 58.96 | 66.02 | 29.92 | 32.05 |
| S-adenosylmethionine-dependent methyltransferase_5 | -2.03 | 1.11E-03 | chr04 | 12347557 | 12349360 | 84.87 | 70.48 | 41.04 | 35.67 |
| Cytochrome P450_203 | -2.03 | 8.42E-09 | chr10 | 57175786 | 57177298 | 190.1 | 215.51 | 100.29 | 99.67 |
| 21kD protein_1 | -2.06 | 1.81E-03 | chr03 | 40102015 | 40102864 | 70.9 | 65.76 | 30.32 | 36.14 |
| Conserved gene of unknown function_4854 | -2.06 | 4.04E-03 | chr10 | 51111644 | 51112600 | 59.21 | 65.41 | 33.08 | 27.39 |
| Conserved gene of unknown function_3754 | -2.07 | 0.04 | chr08 | 5526693 | 5528435 | 43.57 | 42.87 | 17.87 | 23.98 |
| PSI-H_1 | -2.07 | 3.63E-04 | chr06 | 49305821 | 49307605 | 74.15 | 88.44 | 38.89 | 39.51 |
| Beta-ketoacyl-coa synthase family protein_4 | -2.12 | 7.71E-03 | chr08 | 40944428 | 40946611 | 55.69 | 50.14 | 21.59 | 28.35 |
| Beta-galactosidase_7 | -2.12 | 5.59E-07 | chr03 | 60932522 | 60938528 | 298.13 | 251.46 | 150.66 | 108.48 |
| Desacetoxyvindoline 4-hydroxylase_1 | -2.14 | 2.72E-05 | chr04 | 2625517 | 2628817 | 98.79 | 93.55 | 38.86 | 51 |
| 16kDa membrane protein | -2.18 | 1.36E-08 | chr06 | 54752175 | 54753353 | 149.48 | 174.53 | 73.37 | 75.44 |
| Fructose-1,6-bisphosphatase_2 | -2.24 | 5.25E-06 | chr09 | 739209 | 741850 | 90.71 | 104.83 | 40.48 | 46.63 |
| P-coumaroyl quinate/shikimate 3'-hydroxylase_5 | -2.28 | 2.95E-06 | chr10 | 59481981 | 59484716 | 94.67 | 103.89 | 49.64 | 37.52 |
| Gene of unknown function_2136 | -2.28 | 1.68E-04 | chr04 | 7644725 | 7646446 | 78.39 | 63.59 | 29.87 | 32.4 |
| Phosphoribulokinase | -2.34 | 1.37E-08 | chr08 | 48800791 | 48805673 | 142.61 | 179.31 | 63.55 | 73.74 |
| UDP-glucose:glucosyltransferase_17 | -2.35 | 0.04 | chr05 | 7189487 | 7192188 | 39.42 | 29.56 | 14.25 | 15.07 |
| Fructose-bisphosphate aldolase_2 | -2.39 | 0.02 | chr02 | 20680813 | 20683256 | 33.72 | 37.69 | 11.4 | 18.5 |
| Peroxidase 12 | -2.46 | 0.02 | chr04 | 61089723 | 61091577 | 30.79 | 39.89 | 11.15 | 17.53 |
| Nb cell deth marker | -2.85 | 0.02 | chr03 | 49862776 | 49863532 | 23.81 | 27 | 9.58 | 8.23 |
| Zinc finger protein_82 | -3.08 | 5.70E-04 | chr04 | 46475605 | 46480004 | 37.99 | 40.45 | 4.37 | 21.12 |
| CYP72A54_6 | -3.08 | 0.04 | chr10 | 43658746 | 43666340 | 22.28 | 22.18 | 7.13 | 7.29 |
| Flavonoid glucoyltransferase UGT73E2_1 | -3.67 | 3.56E-06 | chr10 | 52432622 | 52434505 | 48 | 41.18 | 14.67 | 9.61 |
| Conserved gene of unknown function_4918 | -3.76 | 4.41E-19 | chr10 | 57306083 | 57307830 | 139.31 | 125.32 | 31.33 | 39.14 |
| Conserved gene of unknown function_3926 | -3.83 | 4.11E-16 | chr08 | 41634497 | 41635721 | 112.52 | 114.09 | 21.27 | 37.91 |
| Conserved gene of unknown function_1306 | -3.93 | 5.02E-04 | chr03 | 850686 | 851294 | 24.93 | 27.03 | 5.75 | 7.48 |
| Caryophyllene/alpha-humulene synthase_1 | -4.07 | 1.36E-08 | chr06 | 41556836 | 41557802 | 52.4 | 83.75 | 14.93 | 18.49 |
| Patatin group O | -4.34 | 3.88E-04 | chr08 | 1649641 | 1654633 | 19.69 | 43.15 | 10.29 | 4.2 |
| Tropinone reductase I | -4.36 | 0.02 | chr10 | 56414553 | 56425560 | 17.8 | 13.92 | 4.2 | 3.08 |
| Pectin methlyesterase inhibitor protein 1 | -4.87 | 1.13E-15 | chr03 | 39768603 | 39769328 | 77.4 | 88.87 | 16.28 | 17.88 |
| Senescence-specific cysteine protease | -4.99 | 2.15E-25 | chr02 | 32269516 | 32271942 | 232.19 | 183.21 | 28.8 | 54.37 |
| Cytokinin oxidase/dehydrogenase_1 | -5.05 | 6.88E-03 | chr01 | 64568551 | 64571106 | 18.22 | 13.85 | 0.94 | 5.41 |
| Metallocarboxypeptidase inhibitor_1 | -11.54 | 3.57E-06 | chr07 | 3198623 | 3200152 | 14.8 | 37.92 | 0.85 | 3.72 |
| Cysteine protease inhibitor 1_3 | -11.56 | 5.66E-03 | chr03 | 49685390 | 49686264 | 5.88 | 17.04 | 0.49 | 1.5 |
| Polyphenoloxidase | -24.73 | 4.31E-07 | chr02 | 34338338 | 34340696 | 16.96 | 23.5 | 0.6 | 1.03 |
| Calcium ion binding protein_12 | #NAME? | 6.66E-05 | chr04 | 3712421 | 3714476 | 16.79 | 7.58 | 0 | 0 |

**Supplementary Table 3: Phenylalanine ammonia lyase (PAL) and Chalcone synthase (CHS) genes annotated in the potato genome DM 1-3 516 R44 v3.04, their length, position in the pseudomolecules and the tissues in which expression is greatest in DM and RH as reported in the University of Toronto BAR ePlant website**

| PAL genes | Size (kbp) | PGSC position | expression in DMb | expression in RHb |
| --- | --- | --- | --- | --- |
| PGSC0003DMG400006637 | 1.03 | chr02:4449620..4450650 | Fruit, tubers | tuber sprouts, roots |
| PGSC0003DMG400031457 | 1.513 | chr03:17248040..17249560 | stolons | none |
| PGSC0003DMG400005492 | 4.664 | chr05:36342700..36347400 | carpels | none |
| PGSC0003DMG400023458a | 3.954 | chr05:51694756..51698709 | none | petioles, stems |
| PGSC0003DMG402021549 | 3.692 | chr09:5502194..5505885 | petals, carpels, stamen stolons, callus | tuber sprouts, roots |
| PGSC0003DMG402021549 | 2.807 | chr09:5510117..5512923 |  |  |
| PGSC0003DMG402021564 | 2.878 | chr09:5530471..5533348 | stolons, tubers | none |
| PGSC0003DMG402021564 | 0.604 | chr09:5539567..5540170 |  |  |
| PGSC0003DMG400019386 | 3.68 | chr10:6301474..6305153 | callus | none |
| PGSC0003DMG400031365a | 404.6 | chr10:51926201..51930606 | stamen, flowers | stamen, flowers, stem, petiole, tuber sprouts |
|  |  |  |  |  |
| CHS genes |  |  |  |  |
| PGSC0003DMG400001635 | 1.823 | chr01:87143395..87145217 | roots | tubers |
| PGSC0003DMG400027146 | 3.192 | chr05:48437160..48440351 | none | roots |
| PGSC0003DMG400019110a | 1.77 | chr05:48886960..48888729 | flowers, petals, carpels | flowers |
| PGSC0003DMG400029620 | 2.084 | chr09:58356999..58359082 | flowers, stamen | flowers, stamen |
| PGSC0003DMG400029621 | 2.51 | chr09:58361561..58364070 | stamen, fruit | flowers, stamen |
| PGSC0003DMG400008635 | 1.021 | chr12:58736647..58737667 | roots | petioles, stems |
| PGSC0003DMG400008633 | 1.192 | chr12:58741442..58742633 | none | petioles, stems |
| PGSC0003DMG400008634 | 1.557 | chr12:58746401..58747957 | fruit | flowers |
| PGSC0003DMG400008632 | 2.593 | chr12:58758677..58761269 | in vitro shoots, petiole | petioles, stems |
| PGSC0003DMG400016867 | 2.525 | chr12:58934717..58937241 | in vitro shoots, petiole | none |
| PGSC0003DMG400016873 | 1.921 | chr12:58954773..58956693 | sepals | none |

asignificantly more highly expressed in purple compared to white flowered bulk samples (Supplementary Table 1).b<http://bar.utoronto.ca/eplant_potato/>

**Supplementary Table 4:** **Summary of current and past designations of relevant *D/P/R* (tuber) and *F/D/P* (floral) loci involved in anthocyanin synthesis in potato**

| PGSC DM1-3 v4.03 Locusa | PGSC DM1-3 v4.03 Transcipt ID | PGSC DM1-3 v4.03 Locationb | PGSC annotation | Tissue expressing anthocyanins | Original gene symbol | Current gene symbol | Citation |
| --- | --- | --- | --- | --- | --- | --- | --- |
| PGSC0003DMG400003605 | PGSC0003DMT400009287 | chr02:40,293,862-40,297,510 | Dihydroflavonol 4-reductase | Tuber skin, flowers | *R* for tuber skin*, D* for flowers | *DFR* | (Van Eck *et al.* 1993; De Jong *et al.* 2004) |
| PGSC0003DMG400013965 | PGSC0003DMT400036281 | chr10:51,749,197-51,750,359 | Transcription factor R2R3-MYB | Tuber skin | *D* [*StAN2;* Jung et al. (2009)] | *StAN1* | (André *et al.* 2009; Payyavula *et al.* 2013; D'amelia *et al.* 2014) |
| PGSC0003DMG400013966 | PGSC0003DMT400036286PGSC0003DMT400036284 | chr10:51,725,169-51,726,374 | MYB transcription Factor | Tuber skin and flesh (Lui et al. 2016)  May be a pseudogene (Jung et al. 2009) | *StAN3* [Jung et al. (2009)] | *StAN2; StMYBA1c* | (André *et al.* 2009; Liu *et al.* 2016) |
| PGSC0003DMG400019217 | PGSC0003DMT400049460 | chr10:51,469,785- 51,470,105 | AN2 | Flower petals | *F* | *StFlAN2* | This article |
| PGSC0003DMG400000425 | PGSC0003DMT400001124  PGSC0003DMT400001125 | chr11:39417579-39420629 | Flavonoid 3',5'-hydroxylase | Tuber skin | *P* | *F3’5’h* | (Jung *et al.* 2005) |

a Locus identification was determined by BLAST searching the primer sequences provided by the authors listed in the citations against DM 1-3 v4.03

b The location is for the area of locus annotation and may encompass the complete coding sequence.

c This gene is found as both *StAN2* and *StMYBA1* in current publications.

**Supplemental Material reference list**

André, C. M., R. Schafleitner, S. Legay, I. Lefèvre, C. A. A. Aliaga *et al.*, 2009 Gene expression changes related to the production of phenolic compounds in potato tubers grown under drought stress. Phytochemistry 70**:** 1107-1116. <https://doi.org/10.1016/j.phytochem.2009.07.008>

D'Amelia, V., R. Aversano, G. Batelli, I. Caruso, M. Castellano Moreno *et al.*, 2014 High *AN1* variability and interaction with basic helix-loop-helix co-factors related to anthocyanin biosynthesis in potato leaves. Plant J. 80**:** 527-540. 10.1111/tpj.12653

De Jong, W., N. Eannetta, D. De Jong and M. Bodis, 2004 Candidate gene analysis of anthocyanin pigmentation loci in the *Solanaceae*. Theor. Appl. Genet. 108**:** 423-432. <https://doi.org/10.1007/s00122-003-1455-1>

Felcher, K. J., J. J. Coombs, A. N. Massa, C. N. Hansey, J. P. Hamilton *et al.*, 2012 Integration of two diploid potato linkage maps with the potato genome sequence. Plos One 7. 10.1371/journal.pone.0036347

Hardigan, M. A., E. Crisovan, J. P. Hamiltion, J. Kim, P. Laimbeer *et al.*, 2016 Genome reduction uncovers a large dispensable genome and adaptive role for copy number variation in asexually propagated *Solanum tuberosum*. Plant Cell 28**:** 388-405. 10.1105/tpc.15.00538

Jung, C. S., H. M. Griffiths, D. M. De Jong, S. Cheng, M. Bodis *et al.*, 2005 The potato *P* locus codes for flavonoid 3′, 5′-hydroxylase. Theor. Appl. Genet. 110**:** 269-275. 10.1007/s00122-004-1829-z

Liu, Y. H., K. Lin-Wang, R. V. Espley, L. Wang, H. Y. Yang *et al.*, 2016 Functional diversification of the potato R2R3 MYB anthocyanin activators AN1, MYBA1, and MYB113 and their interaction with basic helix-loop-helix cofactors. J. Exp. Bot. 67**:** 2159-2176. 10.1093/jxb/erw014

Nadakuduti, S. S., C. G. Starker, D. K. Ko, T. B. Jayakody, C. R. Buell *et al.*, 2019 Evaluation of methods to assess in vivo activity of engineered genome-editing nucleases in protoplasts. Frontiers in Plant Science 10**:** 13. 10.3389/fpls.2019.00110

Payyavula, R. S., R. K. Singh and D. A. Navarre, 2013 Transcription factors, sucrose, and sucrose metabolic genes interact to regulate potato phenylpropanoid metabolism. J. Exp. Bot. 64**:** 5115-5131. 10.1093/jxb/ert303

Peterson, B. A., S. H. Holt, F. P. E. Laimbeer, A. G. Doulis, J. Coombs *et al.*, 2016 Self-fertility in a cultivated diploid potato population examined with the Infinium 8303 potato single-nucleotide polymorphism array. The Plant Genome 9. doi: 10.3835/plantgenome2016.01.0003.

Potato Genome Sequencing Consortium, 2011 Genome sequence and analysis of the tuber crop potato. Nature 475**:** 189-U194. 10.1038/nature10158

van Eck, H. J., J. M. Jacobs, J. van Dijk, W. J. Stiekema and E. Jacobsen, 1993 Identification and mapping of three flower colour loci of potato (*S. tuberosum* L.) by RFLP analysis. Theor. Appl. Genet. 86**:** 295-300. <https://doi.org/10.1007/BF00222091>
